# Supplementary material for: Colorimetric discriminatory array for detection and discrimination of antioxidants based on HAuCl4/3,3′,5,5′-tetramethylbenzidine
Source: Royal Society of Chemistry journal article supplement (doi:10.1039/d0an00617c), 2020-01-01
Supplement: d0an00617c1.pdf [file d0an00617c1.pdf]

## Supporting information

### **Colorimetric discriminatory array for detection and discrimination of antioxidants based on H<sub>2</sub>AuCl<sub>4</sub>/3,3',5,5'-tetramethylbenzidine**

Bin Liu,<sup>†</sup> Ying Chen,<sup>†</sup> Mingqian Zhang, Zhengbo Chen,\* Xia Zuo\*

Department of Chemistry, Capital Normal University, Beijing, 100048, China

E-mail: [czb979216@sina.com](mailto:czb979216@sina.com), [zuoxia@cnu.edu.cn](mailto:zuoxia@cnu.edu.cn)

<sup>†</sup>These authors contribute this work equally

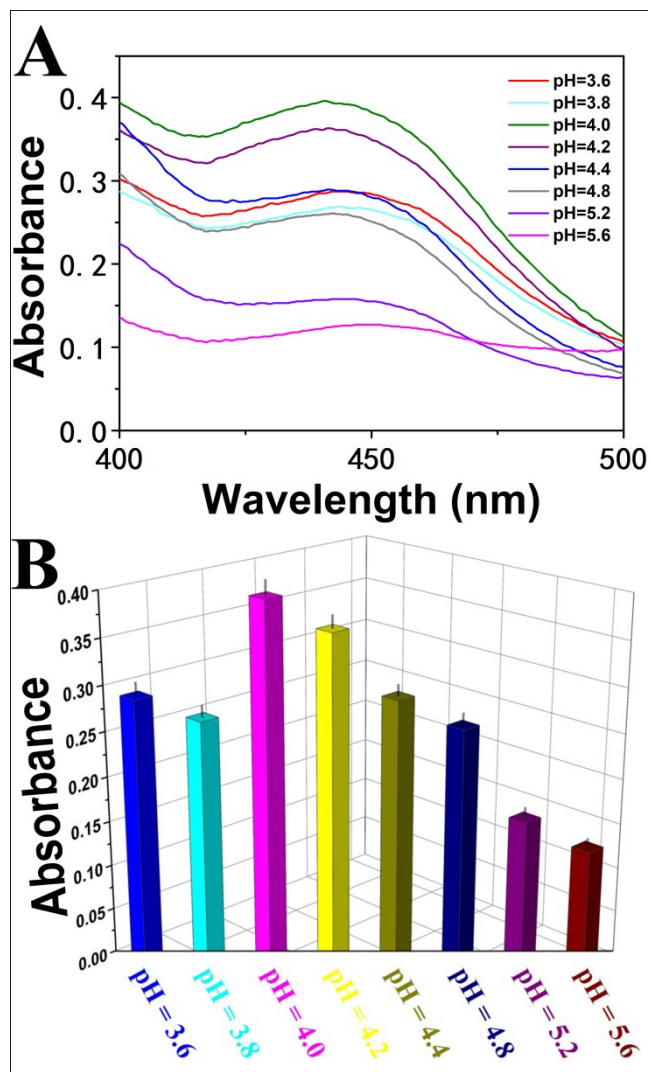

**Fig. S1** UV-vis absorption spectra of oxTMB in the presence of acetate-sodium acetate buffer solution with different pHs. The effect of pH on the absorbance of oxTMB. H<sub>Au</sub>Cl<sub>4</sub> concentration: 0.08 mM, TMB concentration: 0.1 mM.

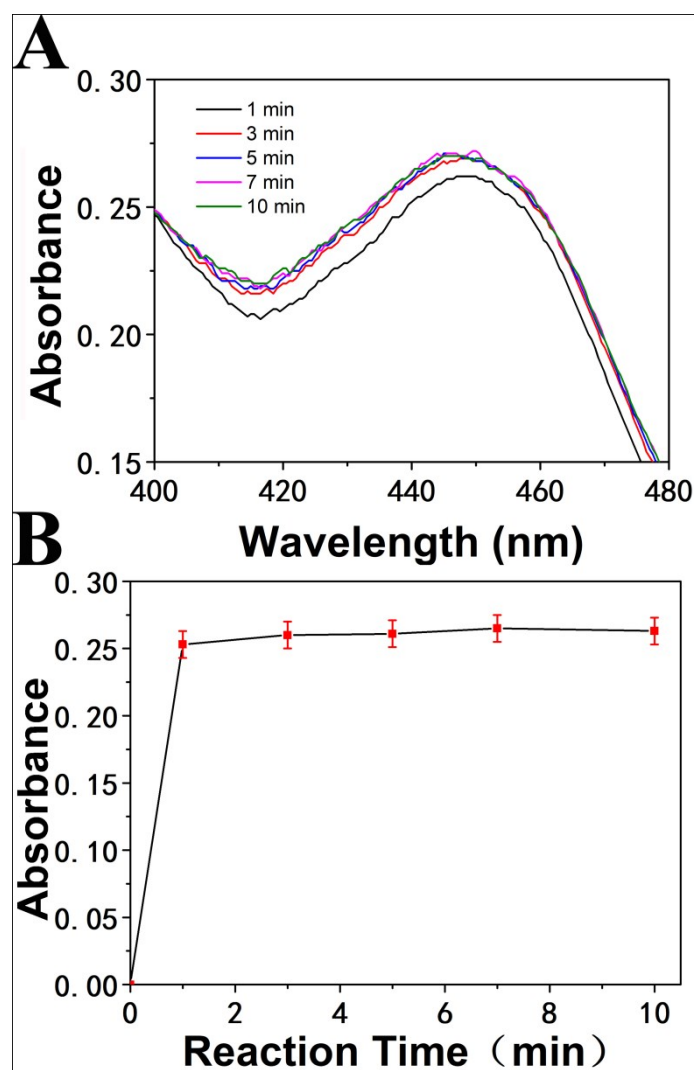

**Fig. S2** UV-vis absorption spectra of oxTMB under different reaction time. The effect of reaction time on the absorbance of oxTMB. H<sub>Au</sub>Cl<sub>4</sub> concentration: 0.08 mM, TMB concentration: 0.1 mM.

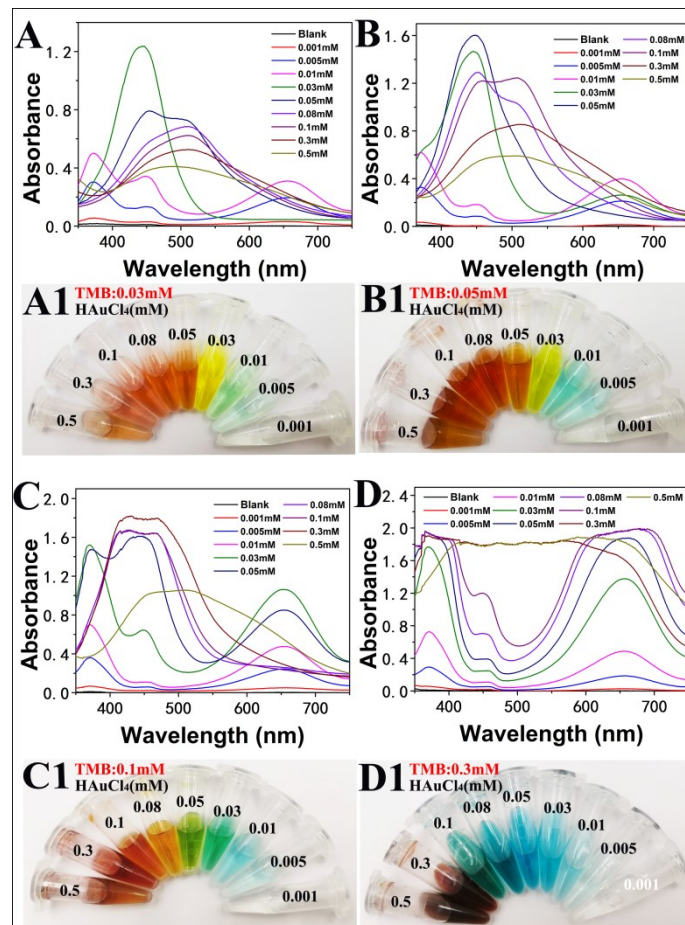

**Fig. S3** UV-vis absorption spectra of TMB in the presence of different concentrations of HAuCl<sub>4</sub> and (A) 0.03 mM TMB, (B) 0.05 mM TMB, (C) 0.1 mM TMB, and (D) 0.3 mM TMB. (A1-D1) The photographs corresponding to (A-D).

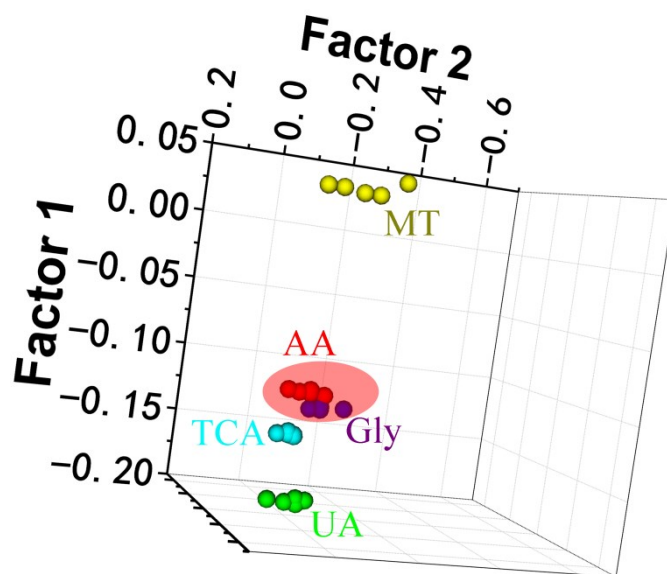

**Fig. S4** Canonical score plots for the discrimination of five different antioxidants at 0.8 nM by the sensor array.

**Table S1** The training matrix of the colorimetric response patterns against 5 antioxidants by using this sensor assay at the concentration of 200 nM.

| Antioxidants | $A_i - A_0(0.03\text{mM HAuCl}_4)$ | $A_i - A_0(0.08\text{mM HAuCl}_4)$ |
|--------------|------------------------------------|------------------------------------|
| AA           | 0.0068                             | -0.1625                            |
| AA           | 0.008                              | -0.1632                            |
| AA           | 0.0084                             | -0.1528                            |
| AA           | 0.0082                             | -0.1499                            |
| AA           | 0.0083                             | -0.1518                            |
| MT           | 0.0169                             | 0.3327                             |
| MT           | 0.0174                             | 0.3201                             |
| MT           | 0.0166                             | 0.3229                             |
| MT           | 0.0156                             | 0.3225                             |
| MT           | 0.0146                             | 0.3194                             |
| UA           | 0.0043                             | 0.0129                             |
| UA           | 0.0048                             | 0.0101                             |
| UA           | 0.0053                             | 0.0171                             |
| UA           | 0.0049                             | 0.0157                             |
| UA           | 0.0044                             | 0.0134                             |
| TCA          | 0.0268                             | 0.008                              |
| TCA          | 0.0278                             | 0.0041                             |
| TCA          | 0.0279                             | 0.0106                             |
| TCA          | 0.0278                             | 0.009                              |
| TCA          | 0.0275                             | 0.0071                             |
| Gly          | 0.0062                             | -0.0428                            |
| Gly          | 0.0072                             | -0.0448                            |
| Gly          | 0.0074                             | -0.0453                            |
| Gly          | 0.0072                             | -0.0463                            |
| Gly          | 0.0066                             | -0.0459                            |

**Table S2** The training matrix of the colorimetric response patterns against 5 antioxidants by using this sensor assay at the concentration of 120 nM.

| Antioxidants | $A_i - A_0(0.03\text{mM HAuCl}_4)$ | $A_i - A_0(0.08\text{mM HAuCl}_4)$ |
|--------------|------------------------------------|------------------------------------|
| AA           | -0.197                             | 0                                  |
| AA           | -0.194                             | -0.08                              |
| AA           | -0.198                             | -0.086                             |
| AA           | -0.197                             | -0.028                             |
| AA           | -0.199                             | -0.12                              |
| MT           | -0.05                              | -0.148                             |
| MT           | -0.051                             | -0.237                             |
| MT           | -0.05                              | -0.115                             |
| MT           | -0.053                             | -0.228                             |
| MT           | -0.052                             | -0.287                             |
| UA           | -0.313                             | -0.077                             |
| UA           | -0.315                             | -0.038                             |
| UA           | -0.311                             | -0.077                             |
| UA           | -0.313                             | -0.093                             |
| UA           | -0.313                             | -0.077                             |
| TCA          | -0.297                             | -0.111                             |
| TCA          | -0.297                             | -0.061                             |
| TCA          | -0.297                             | -0.125                             |
| TCA          | -0.295                             | -0.088                             |
| TCA          | -0.299                             | -0.125                             |
| Gly          | -0.225                             | -0.111                             |
| Gly          | -0.223                             | -0.093                             |
| Gly          | -0.225                             | -0.086                             |
| Gly          | -0.225                             | -0.145                             |
| Gly          | -0.226                             | -0.136                             |

**Table S3** The training matrix of the colorimetric response patterns against 5 antioxidants by using this sensor assay at the concentration of 60 nM.

| Antioxidants | $A_i - A_0(0.03\text{mM HAuCl}_4)$ | $A_i - A_0(0.08\text{mM HAuCl}_4)$ |
|--------------|------------------------------------|------------------------------------|
| AA           | -0.153                             | 0                                  |
| AA           | -0.15                              | 0                                  |
| AA           | -0.154                             | -0.059                             |
| AA           | -0.154                             | 0                                  |
| AA           | -0.154                             | -0.159                             |
| MT           | -0.003                             | -0.115                             |
| MT           | -0.002                             | -0.176                             |
| MT           | -0.002                             | -0.042                             |
| MT           | -0.005                             | -0.176                             |
| MT           | -0.005                             | -0.166                             |
| UA           | -0.246                             | -0.058                             |
| UA           | -0.246                             | 0                                  |
| UA           | -0.246                             | -0.04                              |
| UA           | -0.246                             | -0.055                             |
| UA           | -0.248                             | -0.052                             |
| TCA          | -0.215                             | -0.065                             |
| TCA          | -0.215                             | -0.025                             |
| TCA          | -0.215                             | -0.091                             |
| TCA          | -0.213                             | -0.052                             |
| TCA          | -0.217                             | -0.092                             |
| Gly          | -0.172                             | -0.086                             |
| Gly          | -0.172                             | -0.145                             |
| Gly          | -0.173                             | -0.086                             |
| Gly          | -0.171                             | -0.145                             |
| Gly          | -0.174                             | -0.031                             |



**Table S4** The training matrix of the colorimetric response patterns against 5 antioxidants by using this sensor assay at the concentration of 20 nM.

| Antioxidants | $A_i - A_0(0.03\text{mM HAuCl}_4)$ | $A_i - A_0(0.08\text{mM HAuCl}_4)$ |
|--------------|------------------------------------|------------------------------------|
| AA           | -0.113                             | 0.028                              |
| AA           | -0.112                             | -0.028                             |
| AA           | -0.114                             | 0                                  |
| AA           | -0.114                             | -0.028                             |
| AA           | -0.115                             | -0.065                             |
| MT           | 0.029                              | 0                                  |
| MT           | 0.027                              | -0.138                             |
| MT           | 0.029                              | -0.042                             |
| MT           | 0.027                              | -0.096                             |
| MT           | 0.038                              | -0.204                             |
| UA           | -0.189                             | -0.052                             |
| UA           | -0.191                             | 0                                  |
| UA           | -0.188                             | -0.027                             |
| UA           | -0.19                              | 0.045                              |
| UA           | -0.192                             | -0.03                              |
| TCA          | -0.144                             | 0.014                              |
| TCA          | -0.144                             | 0.042                              |
| TCA          | -0.144                             | 0                                  |
| TCA          | -0.142                             | 0.015                              |
| TCA          | -0.145                             | -1E-3                              |
| Gly          | -0.123                             | -0.059                             |
| Gly          | -0.123                             | -0.12                              |
| Gly          | -0.125                             | -0.059                             |
| Gly          | -0.123                             | -0.12                              |
| Gly          | -0.125                             | -0.031                             |

**Table S5** The training matrix of the colorimetric response patterns against 5 antioxidants by using this sensor assay at the concentration of 1 nM.

| Antioxidants | $A_i - A_0(0.03 \text{ mM HAuCl}_4)$ | $A_i - A_0(0.08 \text{ mM HAuCl}_4)$ |
|--------------|--------------------------------------|--------------------------------------|
| AA           | 0.023                                | -0.2795                              |
| AA           | 0.0231                               | -0.277                               |
| AA           | 0.0218                               | -0.3057                              |
| AA           | 0.022                                | -0.3022                              |
| AA           | 0.022                                | -0.282                               |
| MT           | 0.0466                               | 0.1497                               |
| MT           | 0.0454                               | 0.1499                               |
| MT           | 0.0435                               | 0.1472                               |
| MT           | 0.0408                               | 0.146                                |
| MT           | 0.0393                               | 0.1446                               |
| UA           | 0.0297                               | -0.156                               |
| UA           | 0.0299                               | -0.1568                              |
| UA           | 0.0287                               | -0.159                               |
| UA           | 0.0298                               | -0.1615                              |
| UA           | 0.0292                               | -0.1627                              |
| TCA          | 0.0369                               | -0.0766                              |
| TCA          | 0.0352                               | -0.0734                              |
| TCA          | 0.0365                               | -0.0775                              |
| TCA          | 0.0363                               | -0.0803                              |
| TCA          | 0.0355                               | -0.0798                              |
| Gly          | 0.0633                               | 0.009                                |
| Gly          | 0.0625                               | 0.0099                               |
| Gly          | 0.0618                               | 0.0083                               |
| Gly          | 0.0622                               | 0.0095                               |
| Gly          | 0.061                                | 0.0112                               |

**Table S6** The training matrix of the colorimetric response patterns against AA at different concentrations by using this sensor assay.

| Antioxidants | $A_i - A_0(0.03\text{mM HAuCl}_4)$ | $A_i - A_0(0.08\text{mM HAuCl}_4)$ |
|--------------|------------------------------------|------------------------------------|
| 1 nM         | -0.005                             | 0                                  |
| 1 nM         | -0.005                             | 0                                  |
| 1 nM         | -0.005                             | 0                                  |
| 1 nM         | -0.004                             | -0.035                             |
| 1 nM         | -0.002                             | 0.025                              |
| 5 nM         | -0.017                             | 0                                  |
| 5 nM         | -0.018                             | 0                                  |
| 5 nM         | -0.02                              | -0.033                             |
| 5 nM         | -0.018                             | -0.035                             |
| 5 nM         | -0.016                             | -0.033                             |
| 10 nM        | -0.037                             | 0                                  |
| 10 nM        | -0.037                             | -0.068                             |
| 10 nM        | -0.04                              | -0.033                             |
| 10 nM        | -0.037                             | -0.035                             |
| 10 nM        | -0.035                             | 0                                  |
| 20 nM        | -0.065                             | -0.033                             |
| 20 nM        | -0.067                             | -0.035                             |
| 20 nM        | -0.068                             | 0                                  |
| 20 nM        | -0.065                             | 0                                  |
| 20 nM        | -0.064                             | -0.033                             |
| 40 nM        | -0.083                             | -0.033                             |
| 40 nM        | -0.084                             | -0.035                             |
| 40 nM        | -0.086                             | -0.033                             |
| 40 nM        | -0.084                             | -0.035                             |
| 40 nM        | -0.082                             | 0                                  |
| 80 nM        | -0.121                             | -0.062                             |

---

|        |        |        |
|--------|--------|--------|
| 80 nM  | -0.121 | -0.068 |
| 80 nM  | -0.123 | -0.062 |
| 80 nM  | -0.12  | -0.068 |
| 80 nM  | -0.12  | -0.062 |
| 120 nM | -0.154 | -0.103 |
| 120 nM | -0.156 | -0.097 |
| 120 nM | -0.157 | -0.103 |
| 120 nM | -0.154 | -0.068 |
| 120 nM | -0.155 | -0.062 |
| 200 nM | -0.244 | -0.141 |
| 200 nM | -0.246 | -0.163 |
| 200 nM | -0.248 | -0.141 |
| 200 nM | -0.245 | -0.163 |
| 200 nM | -0.245 | -0.128 |

---

**Table S7** The training matrix of the colorimetric response patterns against MT at different concentrations by using this sensor assay.

| Antioxidants | $A_i - A_0(0.03\text{mM HAuCl}_4)$ | $A_i - A_0(0.08\text{mM HAuCl}_4)$ |
|--------------|------------------------------------|------------------------------------|
| 1 nM         | -0.012                             | 0                                  |
| 1 nM         | -0.01                              | -0.138                             |
| 1 nM         | -0.011                             | -0.042                             |
| 1 nM         | -0.011                             | -0.096                             |
| 1 nM         | -0.009                             | -0.204                             |
| 5 nM         | -0.032                             | -0.08                              |
| 5 nM         | -0.032                             | -0.138                             |
| 5 nM         | -0.032                             | -0.08                              |
| 5 nM         | -0.032                             | -0.138                             |
| 5 nM         | -0.03                              | -0.204                             |
| 10 nM        | -0.055                             | -0.115                             |
| 10 nM        | -0.055                             | -0.176                             |
| 10 nM        | -0.053                             | -0.042                             |
| 10 nM        | -0.056                             | -0.176                             |
| 10 nM        | -0.054                             | -0.166                             |
| 20 nM        | -0.085                             | -0.115                             |
| 20 nM        | -0.083                             | -0.138                             |
| 20 nM        | -0.084                             | -0.115                             |
| 20 nM        | -0.083                             | -0.138                             |
| 20 nM        | -0.084                             | -0.256                             |
| 40 nM        | -0.115                             | -0.148                             |
| 40 nM        | -0.113                             | -0.237                             |
| 40 nM        | -0.114                             | -0.115                             |
| 40 nM        | -0.113                             | -0.228                             |
| 40 nM        | -0.115                             | -0.287                             |
| 80 nM        | -0.151                             | -0.163                             |

---

|        |        |        |
|--------|--------|--------|
| 80 nM  | -0.151 | -0.211 |
| 80 nM  | -0.152 | -0.132 |
| 80 nM  | -0.153 | -0.259 |
| 80 nM  | -0.153 | -0.256 |
| 120 nM | -0.184 | -0.177 |
| 120 nM | -0.184 | -0.287 |
| 120 nM | -0.184 | -0.163 |
| 120 nM | -0.186 | -0.273 |
| 120 nM | -0.184 | -0.287 |
| 200 nM | -0.241 | -0.163 |
| 200 nM | -0.241 | -0.211 |
| 200 nM | -0.24  | -0.132 |
| 200 nM | -0.242 | -0.259 |
| 200 nM | -0.242 | -0.256 |

---

**Table S8** The training matrix of the colorimetric response patterns against UA at different concentrations by using this sensor assay.

| Antioxidants | $A_i - A_0(0.03\text{mM HAuCl}_4)$ | $A_i - A_0(0.08\text{mM HAuCl}_4)$ |
|--------------|------------------------------------|------------------------------------|
| 1 nM         | -0.118                             | 0                                  |
| 1 nM         | -0.118                             | 0                                  |
| 1 nM         | -0.117                             | 0.028                              |
| 1 nM         | -0.117                             | -0.028                             |
| 1 nM         | -0.116                             | 0.028                              |
| 5 nM         | -0.135                             | 0                                  |
| 5 nM         | -0.137                             | 0.055                              |
| 5 nM         | -0.136                             | 0                                  |
| 5 nM         | -0.136                             | -0.028                             |
| 5 nM         | -0.137                             | 0.028                              |
| 10 nM        | -0.163                             | 0                                  |
| 10 nM        | -0.164                             | 0                                  |
| 10 nM        | -0.165                             | 0.028                              |
| 10 nM        | -0.164                             | -0.055                             |
| 10 nM        | -0.163                             | 0                                  |
| 20 nM        | -0.189                             | -0.052                             |
| 20 nM        | -0.191                             | 0                                  |
| 20 nM        | -0.188                             | -0.027                             |
| 20 nM        | -0.19                              | 0.045                              |
| 20 nM        | -0.192                             | -0.03                              |
| 40 nM        | -0.214                             | -0.027                             |
| 40 nM        | -0.216                             | 0.013                              |
| 40 nM        | -0.215                             | -0.027                             |
| 40 nM        | -0.215                             | -0.042                             |
| 40 nM        | -0.217                             | -0.04                              |
| 80 nM        | -0.268                             | -0.065                             |

---

|        |        |        |
|--------|--------|--------|
| 80 nM  | -0.27  | -0.025 |
| 80 nM  | -0.265 | -0.04  |
| 80 nM  | -0.267 | -0.093 |
| 80 nM  | -0.269 | -0.065 |
| 120 nM | -0.313 | -0.077 |
| 120 nM | -0.315 | -0.038 |
| 120 nM | -0.311 | -0.077 |
| 120 nM | -0.313 | -0.093 |
| 120 nM | -0.313 | -0.077 |
| 200 nM | -0.386 | -0.088 |
| 200 nM | -0.388 | -0.061 |
| 200 nM | -0.386 | -0.065 |
| 200 nM | -0.388 | -0.116 |
| 200 nM | -0.389 | -0.088 |

---



**Table S9** The training matrix of the colorimetric response patterns against TCA at different concentrations by using this sensor assay.

| Antioxidants | $A_i - A_0(0.03\text{mM HAuCl}_4)$ | $A_i - A_0(0.08\text{mM HAuCl}_4)$ |
|--------------|------------------------------------|------------------------------------|
| 1 nM         | -0.035                             | 0.129                              |
| 1 nM         | -0.037                             | 0.12                               |
| 1 nM         | -0.036                             | 0.115                              |
| 1 nM         | -0.036                             | 0.093                              |
| 1 nM         | -0.036                             | 0.079                              |
| 5 nM         | -0.055                             | 0.059                              |
| 5 nM         | -0.055                             | 0.085                              |
| 5 nM         | -0.055                             | 0.045                              |
| 5 nM         | -0.055                             | 0.056                              |
| 5 nM         | -0.056                             | 0.043                              |
| 10 nM        | -0.079                             | 0.129                              |
| 10 nM        | -0.079                             | 0.156                              |
| 10 nM        | -0.079                             | 0.045                              |
| 10 nM        | -0.079                             | -0.007                             |
| 10 nM        | -0.078                             | 0.115                              |
| 20 nM        | -0.144                             | 0.014                              |
| 20 nM        | -0.144                             | 0.042                              |
| 20 nM        | -0.144                             | 0                                  |
| 20 nM        | -0.142                             | 0.015                              |
| 20 nM        | -0.145                             | -1E-3                              |
| 40 nM        | -0.181                             | -0.014                             |
| 40 nM        | -0.181                             | 0.014                              |
| 40 nM        | -0.179                             | -0.028                             |
| 40 nM        | -0.177                             | -0.015                             |
| 40 nM        | -0.179                             | -0.03                              |
| 80 nM        | -0.241                             | -0.077                             |

---

|        |        |        |
|--------|--------|--------|
| 80 nM  | -0.241 | -0.061 |
| 80 nM  | -0.239 | -0.091 |
| 80 nM  | -0.24  | -0.088 |
| 80 nM  | -0.243 | -0.102 |
| 120 nM | -0.297 | -0.111 |
| 120 nM | -0.297 | -0.061 |
| 120 nM | -0.297 | -0.125 |
| 120 nM | -0.295 | -0.088 |
| 120 nM | -0.299 | -0.125 |
| 200 nM | -0.419 | -0.19  |
| 200 nM | -0.419 | -0.145 |
| 200 nM | -0.419 | -0.204 |
| 200 nM | -0.417 | -0.172 |
| 200 nM | -0.421 | -0.166 |

---

**Table S10** The training matrix of the colorimetric response patterns against Gly at different concentrations by using this sensor assay.

| Antioxidants | $A_i - A_0(0.03\text{mM HAuCl}_4)$ | $A_i - A_0(0.08\text{mM HAuCl}_4)$ |
|--------------|------------------------------------|------------------------------------|
| 1 nM         | -0.042                             | -0.031                             |
| 1 nM         | -0.042                             | -0.093                             |
| 1 nM         | -0.042                             | 0                                  |
| 1 nM         | -0.04                              | -0.093                             |
| 1 nM         | -0.042                             | -0.059                             |
| 5 nM         | -0.083                             | -0.059                             |
| 5 nM         | -0.083                             | -0.065                             |
| 5 nM         | -0.084                             | -0.086                             |
| 5 nM         | -0.083                             | -0.034                             |
| 5 nM         | -0.083                             | -0.086                             |
| 10 nM        | -0.141                             | -0.031                             |
| 10 nM        | -0.142                             | -0.093                             |
| 10 nM        | -0.142                             | -0.031                             |
| 10 nM        | -0.141                             | -0.12                              |
| 10 nM        | -0.142                             | -0.059                             |
| 20 nM        | -0.19                              | -0.111                             |
| 20 nM        | -0.19                              | -0.12                              |
| 20 nM        | -0.19                              | -0.059                             |
| 20 nM        | -0.19                              | -0.12                              |
| 20 nM        | -0.19                              | -0.031                             |
| 40 nM        | -0.225                             | -0.111                             |
| 40 nM        | -0.223                             | -0.093                             |
| 40 nM        | -0.225                             | -0.086                             |
| 40 nM        | -0.225                             | -0.145                             |
| 40 nM        | -0.226                             | -0.136                             |
| 80 nM        | -0.284                             | -0.136                             |

---

|        |        |        |
|--------|--------|--------|
| 80 nM  | -0.282 | -0.145 |
| 80 nM  | -0.285 | -0.136 |
| 80 nM  | -0.284 | -0.145 |
| 80 nM  | -0.286 | -0.086 |
| 120 nM | -0.042 | -0.031 |
| 120 nM | -0.042 | -0.093 |
| 120 nM | -0.042 | 0      |
| 120 nM | -0.04  | -0.093 |
| 120 nM | -0.042 | -0.059 |
| 200 nM | -0.083 | -0.059 |
| 200 nM | -0.083 | -0.065 |
| 200 nM | -0.084 | -0.086 |
| 200 nM | -0.083 | -0.034 |
| 200 nM | -0.083 | -0.086 |

---

**Table S11** The training matrix of the colorimetric response patterns against the mixture of 2/3 and 4 kinds of antioxidants at 1 nM by using this sensor assay.

| Antioxidants | $A_i - A_0(0.03\text{mM HAuCl}_4)$ | $A_i - A_0(0.08\text{mM HAuCl}_4)$ |
|--------------|------------------------------------|------------------------------------|
| AA:MT=3:1    | -0.0014                            | -0.106                             |
| AA:MT=3:1    | -0.0028                            | -0.1065                            |
| AA:MT=3:1    | -0.0011                            | -0.104                             |
| AA:MT=3:1    | -0.002                             | -0.102                             |
| AA:MT=3:1    | -0.0008                            | -0.0994                            |
| AA:MT=2:2    | 0.0156                             | -0.1876                            |
| AA:MT=2:2    | 0.0144                             | -0.1844                            |
| AA:MT=2:2    | 0.0159                             | -0.1869                            |
| AA:MT=2:2    | 0.0155                             | -0.1821                            |
| AA:MT=2:2    | 0.0169                             | -0.1871                            |
| AA:MT=1:3    | -0.0113                            | -0.2582                            |
| AA:MT=1:3    | -0.0124                            | -0.2592                            |
| AA:MT=1:3    | -0.0107                            | -0.2616                            |
| AA:MT=1:3    | -0.0103                            | -0.2609                            |
| AA:MT=1:3    | -0.0088                            | -0.2658                            |
| AA:TCA=3:1   | -0.007                             | -0.0445                            |
| AA:TCA=3:1   | -0.0096                            | -0.0413                            |
| AA:TCA=3:1   | -0.0086                            | -0.0381                            |
| AA:TCA=3:1   | -0.0095                            | -0.032                             |
| AA:TCA=3:1   | -0.0086                            | -0.0325                            |
| AA:TCA=2:2   | 0.0038                             | -0.0213                            |
| AA:TCA=2:2   | 0.0019                             | -0.021                             |
| AA:TCA=2:2   | 0.0029                             | -0.0203                            |
| AA:TCA=2:2   | 0.0021                             | -0.0143                            |
| AA:TCA=2:2   | 0.0027                             | -0.0183                            |

---

|                |         |         |
|----------------|---------|---------|
| AA:TCA=1:3     | 0.0041  | -0.0496 |
| AA:TCA=1:3     | 0.0038  | -0.0488 |
| AA:TCA=1:3     | 0.0055  | -0.047  |
| AA:TCA=1:3     | 0.0095  | -0.041  |
| AA:TCA=1:3     | 0.0123  | -0.0427 |
| UA:Gly=3:1     | 0.0032  | 0.0201  |
| UA:Gly=3:1     | 0.0007  | 0.0144  |
| UA:Gly=3:1     | 0.0016  | 0.018   |
| UA:Gly=3:1     | 0.0013  | 0.0224  |
| UA:Gly=3:1     | 0.002   | 0.025   |
| UA:Gly=2:2     | 0.0037  | -0.036  |
| UA:Gly=2:2     | 0.0003  | -0.0397 |
| UA:Gly=2:2     | 0.0007  | -0.036  |
| UA:Gly=2:2     | 0.0006  | -0.0316 |
| UA:Gly=2:2     | 0.001   | -0.0293 |
| AA:MT:UA=1:2:2 | 0.0189  | -0.1635 |
| AA:MT:UA=1:2:2 | 0.0205  | -0.1643 |
| AA:MT:UA=1:2:2 | 0.0207  | -0.1643 |
| AA:MT:UA=1:2:2 | 0.0222  | -0.1645 |
| AA:MT:UA=1:2:2 | 0.0231  | -0.1645 |
| AA:MT:UA=1:3:1 | -0.0047 | -0.2152 |
| AA:MT:UA=1:3:1 | -0.0023 | -0.2165 |
| AA:MT:UA=1:3:1 | -0.0022 | -0.2271 |
| AA:MT:UA=1:3:1 | -2E-4   | -0.2296 |
| AA:MT:UA=1:3:1 | 4E-4    | -0.231  |
| AA:MT:UA=2:2:1 | 3E-4    | -0.2097 |
| AA:MT:UA=2:2:1 | -6E-4   | -0.2101 |
| AA:MT:UA=2:2:1 | -3E-4   | -0.2102 |
| AA:MT:UA=2:2:1 | 1E-3    | -0.2106 |

---

---

|                      |         |         |
|----------------------|---------|---------|
| AA:MT:UA=2:2:1       | 0.002   | -0.2106 |
| AA:MT:UA=2:1:2       | -1E-4   | -0.1324 |
| AA:MT:UA=2:1:2       | -1E-4   | -0.1335 |
| AA:MT:UA=2:1:2       | -5E-4   | -0.1342 |
| AA:MT:UA=2:1:2       | 1E-3    | -0.1372 |
| AA:MT:UA=2:1:2       | 0.0018  | -0.1346 |
| AA:MT:UA=3:1:1       | 0.0223  | -0.1427 |
| AA:MT:UA=3:1:1       | 0.0226  | -0.1449 |
| AA:MT:UA=3:1:1       | 0.0218  | -0.1499 |
| AA:MT:UA=3:1:1       | 0.0227  | -0.1551 |
| AA:MT:UA=3:1:1       | 0.024   | -0.1558 |
| AA:MT:UA=1:1:3       | 0.0039  | -0.1573 |
| AA:MT:UA=1:1:3       | 0.0036  | -0.1573 |
| AA:MT:UA=1:1:3       | 0.0022  | -0.1585 |
| AA:MT:UA=1:1:3       | 0.0051  | -0.1606 |
| AA:MT:UA=1:1:3       | 0.0052  | -0.1656 |
| AA:MT:UA:TCA=2:1:1:1 | 0.0024  | -0.1451 |
| AA:MT:UA:TCA=2:1:1:1 | 0.0022  | -0.1442 |
| AA:MT:UA:TCA=2:1:1:1 | 0.0023  | -0.1416 |
| AA:MT:UA:TCA=2:1:1:1 | 0.0039  | -0.1441 |
| AA:MT:UA:TCA=2:1:1:1 | 0.0042  | -0.1414 |
| AA:MT:UA:TCA=1:2:1:1 | -0.0035 | -0.2565 |
| AA:MT:UA:TCA=1:2:1:1 | -0.002  | -0.2604 |
| AA:MT:UA:TCA=1:2:1:1 | -0.0012 | -0.2607 |
| AA:MT:UA:TCA=1:2:1:1 | 7E-4    | -0.263  |
| AA:MT:UA:TCA=1:2:1:1 | 0.0015  | -0.2648 |
| AA:MT:UA:TCA=1:1:2:1 | -0.0043 | -0.1488 |
| AA:MT:UA:TCA=1:1:2:1 | -0.0034 | -0.1543 |
| AA:MT:UA:TCA=1:1:2:1 | -0.0026 | -0.1585 |

---

---

|                      |        |         |
|----------------------|--------|---------|
| AA:MT:UA:TCA=1:1:2:1 | -1E-3  | -0.1593 |
| AA:MT:UA:TCA=1:1:2:1 | -4E-4  | -0.1625 |
| AA:MT:UA:TCA=1:1:1:2 | 0.0026 | -0.1    |
| AA:MT:UA:TCA=1:1:1:2 | 0.0047 | -0.104  |
| AA:MT:UA:TCA=1:1:1:2 | 0.0051 | -0.1061 |
| AA:MT:UA:TCA=1:1:1:2 | 0.0067 | -0.1069 |
| AA:MT:UA:TCA=1:1:1:2 | 0.0067 | -0.1075 |

---



**Table S12** The training matrix of the colorimetric response patterns against the 14 antioxidants at different concentrations by using this sensor assay.

| Antioxidants | $A_i - A_0(0.03\text{mM HAuCl}_4)$ | $A_i - A_0(0.08\text{mM HAuCl}_4)$ |
|--------------|------------------------------------|------------------------------------|
| AA(200nM)    | -0.244                             | -0.141                             |
| AA(200nM)    | -0.246                             | -0.163                             |
| AA(200nM)    | -0.248                             | -0.141                             |
| AA(200nM)    | -0.245                             | -0.163                             |
| AA(200nM)    | -0.245                             | -0.128                             |
| MT(1nM)      | -0.012                             | 0                                  |
| MT(1nM)      | -0.01                              | -0.138                             |
| MT(1nM)      | -0.011                             | -0.042                             |
| MT(1nM)      | -0.011                             | -0.096                             |
| MT(1nM)      | -0.009                             | -0.204                             |
| MT(10nM)     | -0.055                             | -0.115                             |
| MT(10nM)     | -0.055                             | -0.176                             |
| MT(10nM)     | -0.053                             | -0.042                             |
| MT(10nM)     | -0.056                             | -0.176                             |
| MT(10nM)     | -0.054                             | -0.166                             |
| MT(20nM)     | -0.085                             | -0.115                             |
| MT(20nM)     | -0.083                             | -0.138                             |
| MT(20nM)     | -0.084                             | -0.115                             |
| MT(20nM)     | -0.083                             | -0.138                             |
| MT(20nM)     | -0.084                             | -0.256                             |
| MT(40nM)     | -0.115                             | -0.148                             |
| MT(40nM)     | -0.113                             | -0.237                             |
| MT(40nM)     | -0.114                             | -0.115                             |
| MT(40nM)     | -0.113                             | -0.228                             |
| MT(40nM)     | -0.115                             | -0.287                             |
| UA(5nM)      | -0.135                             | 0                                  |

---

|            |        |        |
|------------|--------|--------|
| UA(5nM)    | -0.137 | 0.055  |
| UA(5nM)    | -0.136 | 0      |
| UA(5nM)    | -0.136 | -0.028 |
| UA(5nM)    | -0.137 | 0.028  |
| UA(10nM)   | -0.163 | 0      |
| UA(10nM)   | -0.164 | 0      |
| UA(10nM)   | -0.165 | 0.028  |
| UA(10nM)   | -0.164 | -0.055 |
| UA(10nM)   | -0.163 | 0      |
| UA(80nM)   | -0.268 | -0.065 |
| UA(80nM)   | -0.27  | -0.025 |
| UA(80nM)   | -0.265 | -0.04  |
| UA(80nM)   | -0.267 | -0.093 |
| UA(80nM)   | -0.269 | -0.065 |
| UA(120nM)  | -0.313 | -0.077 |
| UA(120nM)  | -0.315 | -0.038 |
| UA(120nM)  | -0.311 | -0.077 |
| UA(120nM)  | -0.313 | -0.093 |
| UA(120nM)  | -0.313 | -0.077 |
| UA(200nM)  | -0.386 | -0.088 |
| UA(200nM)  | -0.388 | -0.061 |
| UA(200nM)  | -0.386 | -0.065 |
| UA(200nM)  | -0.388 | -0.116 |
| UA(200nM)  | -0.389 | -0.088 |
| TCA(200nM) | -0.419 | -0.19  |
| TCA(200nM) | -0.419 | -0.145 |
| TCA(200nM) | -0.419 | -0.204 |
| TCA(200nM) | -0.417 | -0.172 |
| TCA(200nM) | -0.421 | -0.166 |

---

---

|            |        |        |
|------------|--------|--------|
| Gly(80nM)  | -0.19  | -0.111 |
| Gly(80nM)  | -0.19  | -0.12  |
| Gly(80nM)  | -0.19  | -0.059 |
| Gly(80nM)  | -0.19  | -0.12  |
| Gly(80nM)  | -0.19  | -0.031 |
| Gly(120nM) | -0.225 | -0.111 |
| Gly(120nM) | -0.223 | -0.093 |
| Gly(120nM) | -0.225 | -0.086 |
| Gly(120nM) | -0.225 | -0.145 |
| Gly(120nM) | -0.226 | -0.136 |
| Gly(200nM) | -0.284 | -0.136 |
| Gly(200nM) | -0.282 | -0.145 |
| Gly(200nM) | -0.285 | -0.136 |
| Gly(200nM) | -0.284 | -0.145 |
| Gly(200nM) | -0.286 | -0.086 |

---

**Table S13** The training matrix of the colorimetric response patterns against the 5 analytes at 10 nM with LIA, DA, PDA, GSH, and Cys at 100 nM as potential interferences using this sensor assay.

| Antioxidants | $A_i - A_0(0.03\text{mM HAuCl}_4)$ | $A_i - A_0(0.08\text{mM HAuCl}_4)$ |
|--------------|------------------------------------|------------------------------------|
| AA           | 0.023                              | -0.2795                            |
| AA           | 0.0231                             | -0.277                             |
| AA           | 0.0218                             | -0.3057                            |
| AA           | 0.022                              | -0.3022                            |
| AA           | 0.022                              | -0.282                             |
| MT           | 0.0466                             | 0.1497                             |
| MT           | 0.0454                             | 0.1499                             |
| MT           | 0.0435                             | 0.1472                             |
| MT           | 0.0408                             | 0.146                              |
| MT           | 0.0393                             | 0.1446                             |
| UA           | 0.0297                             | -0.156                             |
| UA           | 0.0299                             | -0.1568                            |
| UA           | 0.0287                             | -0.159                             |
| UA           | 0.0298                             | -0.1615                            |
| UA           | 0.0292                             | -0.1627                            |
| TCA          | 0.0369                             | -0.0766                            |
| TCA          | 0.0352                             | -0.0734                            |
| TCA          | 0.0365                             | -0.0775                            |
| TCA          | 0.0363                             | -0.0803                            |
| TCA          | 0.0355                             | -0.0798                            |
| Gly          | 0.0633                             | 0.009                              |
| Gly          | 0.0625                             | 0.0099                             |
| Gly          | 0.0618                             | 0.0083                             |
| Gly          | 0.0622                             | 0.0095                             |
| Gly          | 0.061                              | 0.0112                             |
| LIA          | -0.0064                            | -0.7023                            |
| LIA          | -0.0062                            | -0.7035                            |
| LIA          | -0.006                             | -0.7125                            |
| LIA          | -0.0053                            | -0.7218                            |
| LIA          | -0.0025                            | -0.7284                            |
| DA           | -0.237                             | -0.6805                            |
| DA           | -0.2374                            | -0.6823                            |
| DA           | -0.2384                            | -0.6958                            |
| DA           | -0.2397                            | -0.7028                            |
| DA           | -0.2393                            | -0.7087                            |
| PDA          | -0.1965                            | -0.5276                            |
| PDA          | -0.1961                            | -0.5336                            |
| PDA          | -0.1987                            | -0.5466                            |
| PDA          | -0.1998                            | -0.5566                            |

---

|     |         |         |
|-----|---------|---------|
| PDA | -0.1998 | -0.5621 |
| GSH | 0.0033  | -0.0078 |
| GSH | 0.0033  | 0.0015  |
| GSH | 0.0026  | -0.0015 |
| GSH | 0.003   | 0       |
| GSH | 0.0045  | -0.0014 |
| Cys | -0.013  | 0.0087  |
| Cys | -0.0142 | 0.0146  |
| Cys | -0.0146 | 0.014   |
| Cys | -0.0151 | 0.0168  |
| Cys | -0.0128 | 0.0169  |

---

**Table S14** The training matrix of the colorimetric response patterns against the 5 antioxidants at 1 nM in serum samples by using this sensor assay.

| Antioxidants | $A_i - A_0(0.03\text{mM HAuCl}_4)$ | $A_i - A_0(0.08\text{mM HAuCl}_4)$ |
|--------------|------------------------------------|------------------------------------|
| AA           | -0.0084                            | -0.1318                            |
| AA           | -0.0176                            | -0.1271                            |
| AA           | -0.0191                            | -0.1265                            |
| AA           | -0.0119                            | -0.1312                            |
| AA           | -0.0167                            | -0.1262                            |
| MT           | 0.0018                             | -0.1456                            |
| MT           | -0.0068                            | -0.1399                            |
| MT           | -0.0043                            | -0.1392                            |
| MT           | 0.0021                             | -0.1393                            |
| MT           | -1E-4                              | -0.1376                            |
| UA           | -0.0028                            | -0.0504                            |
| UA           | -0.0143                            | -0.0463                            |
| UA           | -0.0124                            | -0.0492                            |
| UA           | -0.0061                            | -0.0505                            |
| UA           | -5E-4                              | -0.0491                            |
| TCA          | 6E-4                               | -0.1032                            |
| TCA          | -0.0085                            | -0.101                             |
| TCA          | -0.0058                            | -0.1019                            |
| TCA          | 2E-4                               | -0.1029                            |
| TCA          | -0.0019                            | -0.102                             |
| Gly          | -0.0084                            | -0.1318                            |
| Gly          | -0.0176                            | -0.1271                            |
| Gly          | -0.0191                            | -0.1265                            |
| Gly          | -0.0119                            | -0.1312                            |
| Gly          | -0.0167                            | -0.1262                            |
